# Supplementary material for: Prediction of biological age by morphological staging of sarcopenia in Caenorhabditis elegans
Source: Oxford University Press journal article supplement (doi:10.1242/dmm.049169), 2021-11-01
Supplement: dmm049169supp.pdf [file dmm049169supp.pdf]

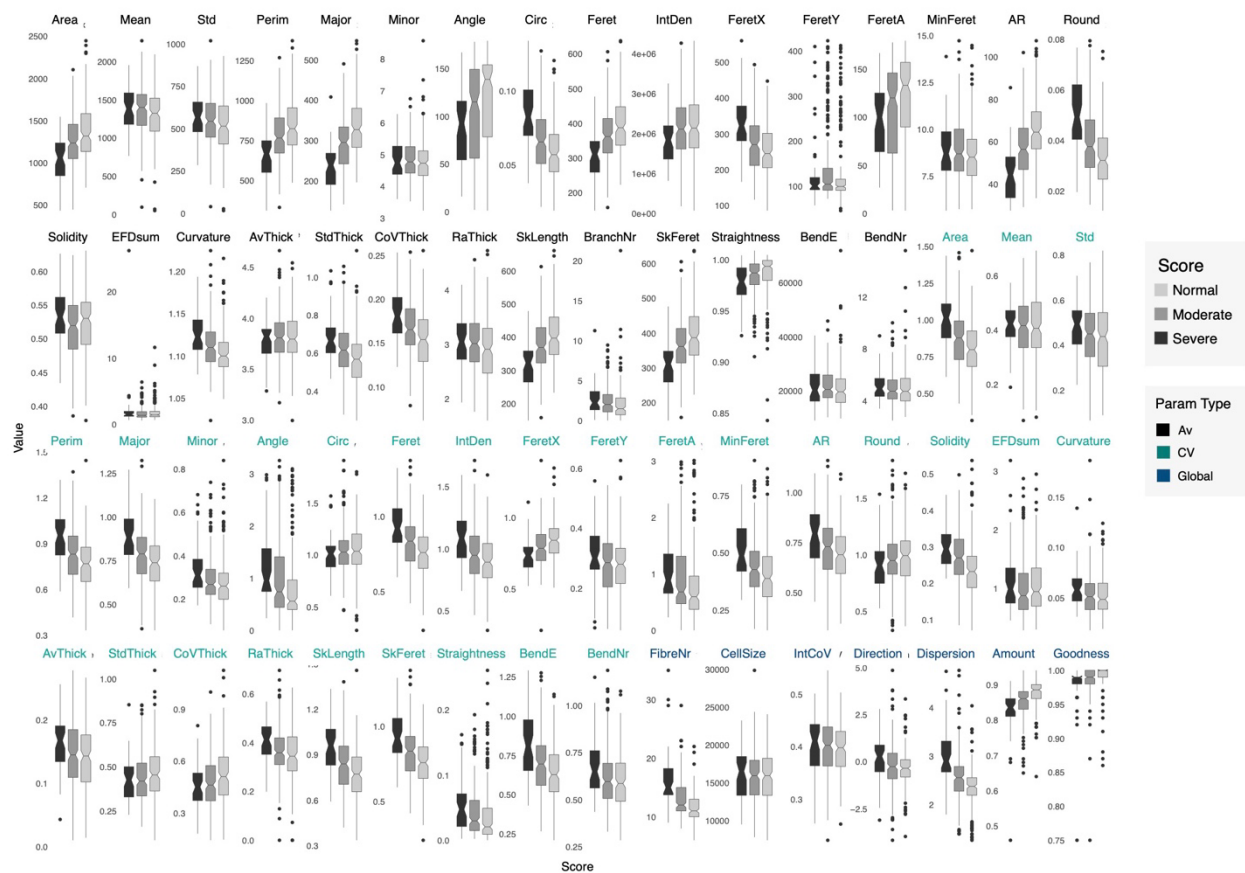

**Fig. S1.** Boxplots of all features as a function of manually assigned sarcopenia score.

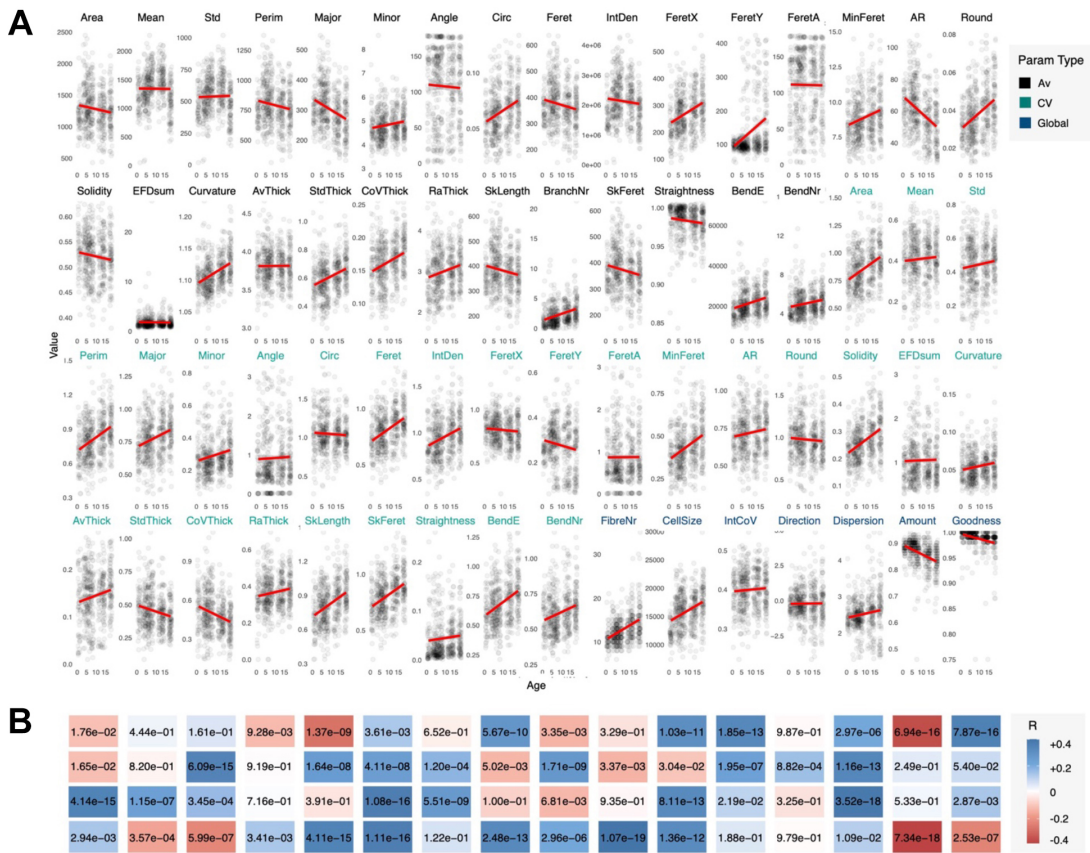

**Fig. S2.** Univariate regression of individual features as a function of chronological age. (A) Scatterplots of with linear regression line in red. (B) Color-coded correlation coefficients of the same parameters with their respective p-value.

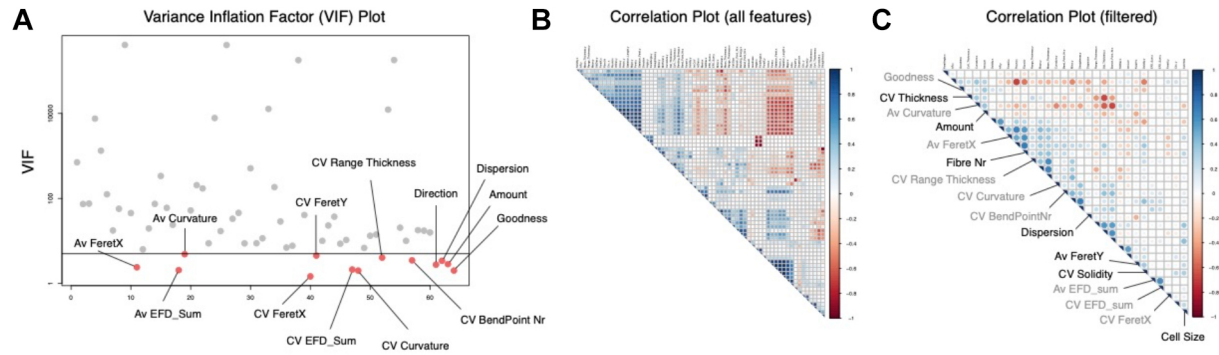

**Fig. S3.** Complementary feature selection methods for model simplification. (A) variance inflation factor (VIF) plot of the complete model showing features with a VIF below 5 in red. (B, C) Correlation plot of all features (B) and after retention of only those features with correlation below 0.7 (C). Those corresponding with VIF selected are indicated in grey, those retained in the final model in black.
